# Supplementary material
Source: publisher figshare collection journal article supplement (https://frontiersin.figshare.com/ndownloader/files/30569175)
Supplement: Supplementary file 1 [file 30569175]

**Online Appendix**

**Table A1**. Descriptive statistics

| Variable | Obs | Mean | Std. Dev. | Min | Max |
| --- | --- | --- | --- | --- | --- |
| UP vs. PSOE | 1,631 | 0.29 | 0.45 | 0 | 1 |
| Vox vs. PP | 1,026 | 0.35 | 0.48 | 0 | 1 |
| Cs vs. PP | 912 | 0.27 | 0.45 | 0 | 1 |
| Age (6 cat.) | 4,804 | 3.99 | 1.60 | 1 | 6 |
| Sex | 4,804 | 0.52 | 0.50 | 0 | 1 |
| Education (3 cat.) | 4,785 | 2.03 | 0.65 | 1 | 3 |
| Radical ideology (0=5 center, 4=1 or 10) | 4,041 | 1.26 | 1.20 | 0 | 4 |
| Political interest (4 cat.) | 4,800 | 2.20 | 0.95 | 1 | 4 |
| Economic egotropic evaluation | 4,781 | 3.38 | 1.39 | 1 | 5 |
| Salience of immigration | 4,804 | 0.10 | 0.30 | 0 | 1 |
| Salience of corruption | 4,804 | 0.20 | 0.40 | 0 | 1 |
| Political disaffection | 4,804 | 0.49 | 0.50 | 0 | 1 |
| Salience of the Catalan issue | 4,804 | 0.12 | 0.32 | 0 | 1 |
| Direct impact of the Catalan issue on vote choice | 4,782 | 0.23 | 0.42 | 0 | 1 |

*Source*: CIS (2019b).

**Table A2**. Vote for Unidas Podemos vs. PSOE, Ciudadanos vs. PP, and Vox vs. PP.

|  | (1) | (2) | (3) |
| --- | --- | --- | --- |
|  | UP vs. PSOE | Cs vs. PP | Vox vs. PP |
| Age categories (*ref. 18-24*) | 0.00 | 0.00 | 0.00 |
| 25-34 | -0.32 | -0.22 | -0.33 |
| 35-44 | -0.71** | -0.42 | -0.83* |
| 45-54 | -1.23*** | -0.51 | -1.42*** |
| 55-64 | -1.50*** | -0.82 | -1.76*** |
| >64 | -2.36*** | -1.37** | -2.31*** |
| Gender (*ref. Male*) | 0.00 | 0.00 | 0.00 |
| Female | -0.19 | -0.13 | -0.75*** |
| Education (*ref. Primary or less*) | 0.00 | 0.00 | 0.00 |
| Secondary | 0.48 | 0.38 | 0.91** |
| University | 0.65* | 0.66 | -0.08 |
| Radical ideology (*ref. Center [5]*) | 0.00 | 0.00 | 0.00 |
| +/- 1 | 0.06 | -0.89*** | 0.23 |
| +/- 2 | 1.31*** | -2.63*** | 0.16 |
| +/- 3 | 1.95*** | -3.44*** | 0.95** |
| +/- 4 | 2.03*** | -1.99* | 1.68*** |
| Interest in politics (*ref. None*) | 0.00 | 0.00 | 0.00 |
| Little | 0.17 | 0.37 | -0.34 |
| Quite a lot | 0.72** | 0.03 | -0.19 |
| A lot | 1.07*** | 0.09 | 0.25 |
| Economic egotropic evaluation (*ref. Very bad or bad*) | 0.00 | 0.00 | 0.00 |
| Average | -0.01 | -0.07 | -0.36 |
| Good or very good | -0.06 | -0.07 | -0.73** |
| Immigration issue salience (*ref. Not important*) | 0.00 | 0.00 | 0.00 |
| Important issue | -0.60 | -0.64 | 1.23*** |
| Corruption issue salience (*ref. Not important*) | 0.00 | 0.00 | 0.00 |
| Important issue | 0.42* | 0.61* | 0.39 |
| Political dissatisfaction – Politicians, parties and politics as a problem (*ref. Not important*) | 0.00 | 0.00 | 0.00 |
| Important issue | -0.17 | -0.12 | -0.04 |
| Catalan independence issue salience (*ref. Not important*) | 0.00 | 0.00 | 0.00 |
| Important issue | -0.55* | -0.21 | 0.03 |
| Direct impact of the Catalan issue on vote choice (*ref. No effect*) | 0.00 | 0.00 | 0.00 |
| Had an effect | -0.21 | -0.03 | 0.85*** |
| Constant | -1.61** | 0.11 | 0.14 |
| Observations | 1532 | 830 | 932 |
| Regional Fixed Effects | Yes | Yes | Yes |
| Log lik. | -706.06 | -376.05 | -422.47 |

*Source*: CIS (2019b). Notes: Logistic regression coefficients. Dependent variables are binary, coded as vote for Unidas Podemos=1, vote for PSOE=0 in model 1; vote for Ciudadanos=1, vote for PP=0 in model 2; and vote for Vox=1, vote for PP=0 in model 3. Data weighted, robust standard errors, * p<0.05, ** p<0.01, *** p<0.001.
